# Supplementary material
Source: PubMed Central journal article supplement (PMC2396890)

**Table S1.** Data on human brain tissue analyzed in Figure 1. Beclin 1 levels did not correlate with either age or PMT. There was no significant difference in Beclin 1 levels between males and females. PMT; Time to Post Mortem (hours), MMSE; Mini Mental State Evaluation, C; non-demented control, AD; Alzheimer’s disease, MCI; Mild Cognitive Impairment, LBV; Lewy Body variant of AD, HD; Huntington’s disease, n/a; not available. Values are mean  $\pm$  SE.

| Diagnosis | n  | Age            | MMSE           | PMT           |
|-----------|----|----------------|----------------|---------------|
| C         | 19 | 75.4 $\pm$ 2.7 | 28.1 $\pm$ 0.8 | 7.7 $\pm$ 1.1 |
| AD        | 16 | 80.5 $\pm$ 2.6 | 3.8 $\pm$ 1.3  | 7.7 $\pm$ 1.0 |
| MCI       | 11 | 85.0 $\pm$ 2.7 | 28.8 $\pm$ 0.4 | n/a           |
| LBV       | 5  | 83.2 $\pm$ 1.0 | 14.0 $\pm$ 4.7 | 2.3 $\pm$ 1.0 |
| HD        | 7  | 54.7 $\pm$ 6.0 | n/a            | 8.6 $\pm$ 1.3 |

**Table S2.** Relative size of hippocampus and motor cortex in 9-month-old female mice were unchanged by beclin 1 deficiency. No significant differences were observed between the groups (t-test). Digitized images from 3-6 coronal sections (30  $\mu$ m) at 360  $\mu$ m intervals through the region of interest were captured and analyzed using Metamorph software. The region of interest (hip; hippocampus, mt ctx; motor cortex) was outlined, and the mean total number of pixels calculated. The investigator was blinded to genotype.

| Genotype                                              | Region | N | Mean area (pixels $\pm$ SEM) |
|-------------------------------------------------------|--------|---|------------------------------|
| <i>APP</i> <sup>+</sup> , <i>Becn1</i> <sup>+/+</sup> | mt ctx | 7 | 1082641 $\pm$ 26062          |
| <i>APP</i> <sup>+</sup> , <i>Becn1</i> <sup>+/-</sup> | mt ctx | 8 | 1052164 $\pm$ 15265          |
| <i>APP</i> <sup>+</sup> , <i>Becn1</i> <sup>+/+</sup> | hip    | 6 | 780864 $\pm$ 38376           |
| <i>APP</i> <sup>+</sup> , <i>Becn1</i> <sup>+/-</sup> | hip    | 8 | 878921 $\pm$ 37726           |

**Figure S1.** Beclin 1 immunoreactivity in sections from mid-frontal cortex of control and AD patients. Adjacent sections were stained with Cresyl violet to show neuron number. I-VI signify Braak stages of the representative AD cases, from mild (I), to severe (VI).

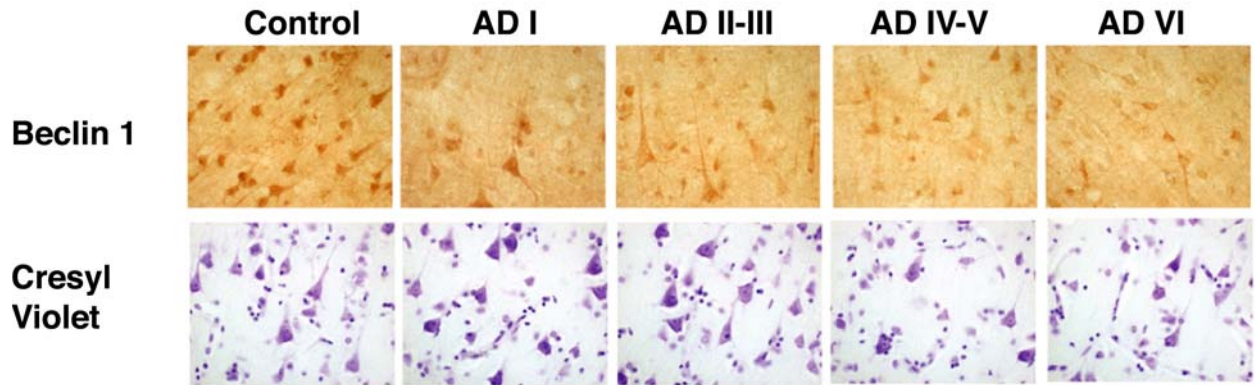

**Figure S2.** APP and CTF levels are equivalent in young *APP, Becn1<sup>+/+</sup>* and *APP, Becn1<sup>+/-</sup>* mice. APP (A, B), CTF $\beta$  (A, C), and CTF $\alpha$  levels (A, D) in the neocortex of 3-month-old *APP, Becn1<sup>+/+</sup>* mice (n = 3) and *APP, Becn1<sup>+/-</sup>* mice (n = 4). A representative western blot from replicate experiments (A) was probed with APP, CTF, and Actin antibodies. APP bands were normalized to Actin (B). CTF bands from the same samples on an independent blot were also normalized to Actin (C, D). All bars are mean  $\pm$  SEM; mean differences were compared by unpaired Student's *t* test.

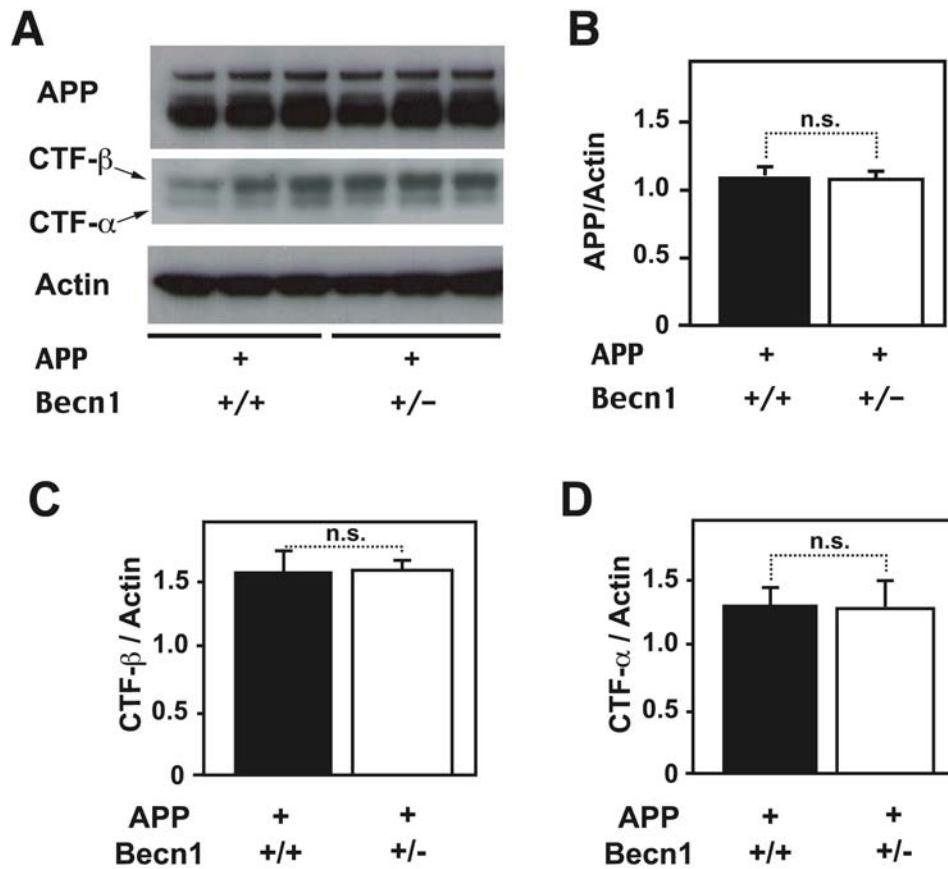

**Figure S3.** Distinct staining patterns in APP transgenic brains with antibodies detecting the APP holoprotein or A $\beta$ . (**A, B**) Neocortex from nontransgenic mice (Non-tg) or 3, 6, and 12-month-old mice stained with antibodies recognizing human A $\beta_{17-24}$  (**A, B**) or human APP<sub>444-592</sub> (**C, D**). While A $\beta$  immunostaining accumulates with age, APP immunostaining does not change or decreases slightly with age.

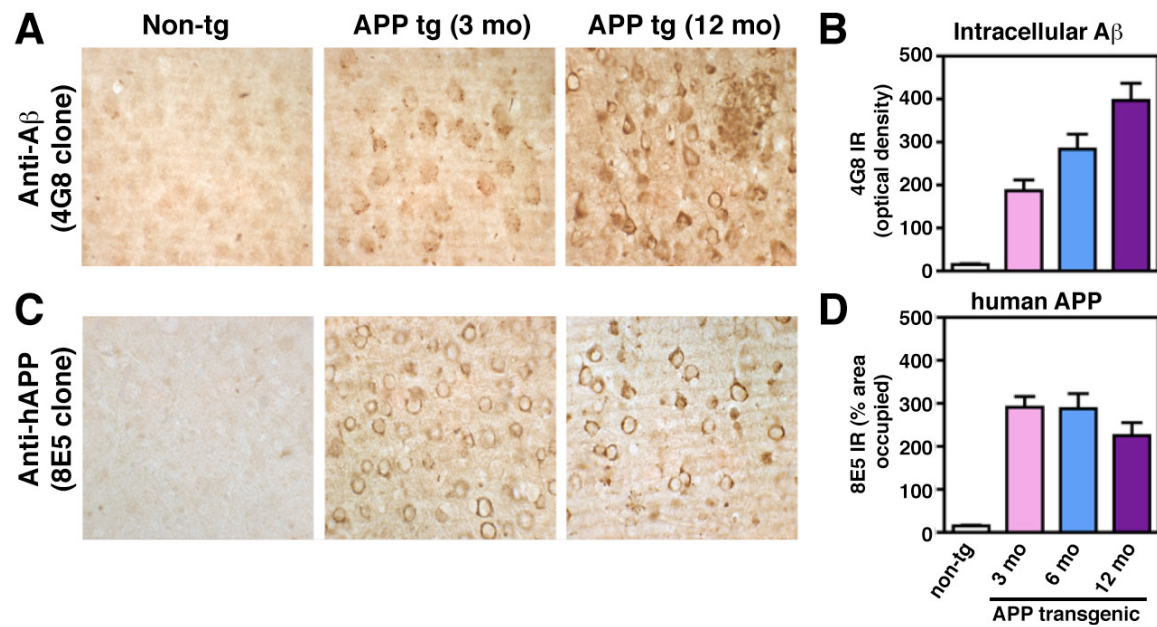

**Figure S4.** Intracellular A $\beta$  is partially colocalized with Cathepsin D. (**A-D**) brain sections from a 9-month-old APP transgenic mouse were treated with formic acid to reveal intracellular A $\beta$  and stained with antibodies against 4G8 (A $\beta$ <sub>17-24</sub>; **B, C**) or 3D6 (A $\beta$ <sub>1-5</sub>; **D**). Both antibodies show a granular intracellular staining pattern in neurons (**B, D**). Double staining with an antibody against cathepsin D (**A**) shows partial colocalization with A $\beta$  (arrows). Scale bars represent 20  $\mu$ m.

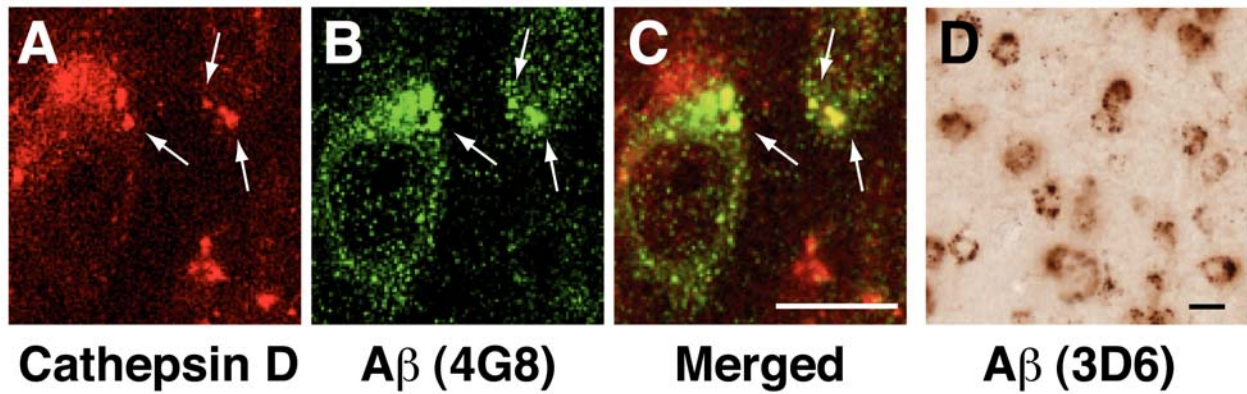

**Figure S5.** Additional ultrastructural disruptions in APP+, Becn1+/- mice. Lamellar bodies accumulated at synapses (arrowheads). Additional autophagosome like laminar bodies were identified (double arrowheads). Further pathological structures included fibrils (arrows) and electron dense bodies in axons (double arrows)

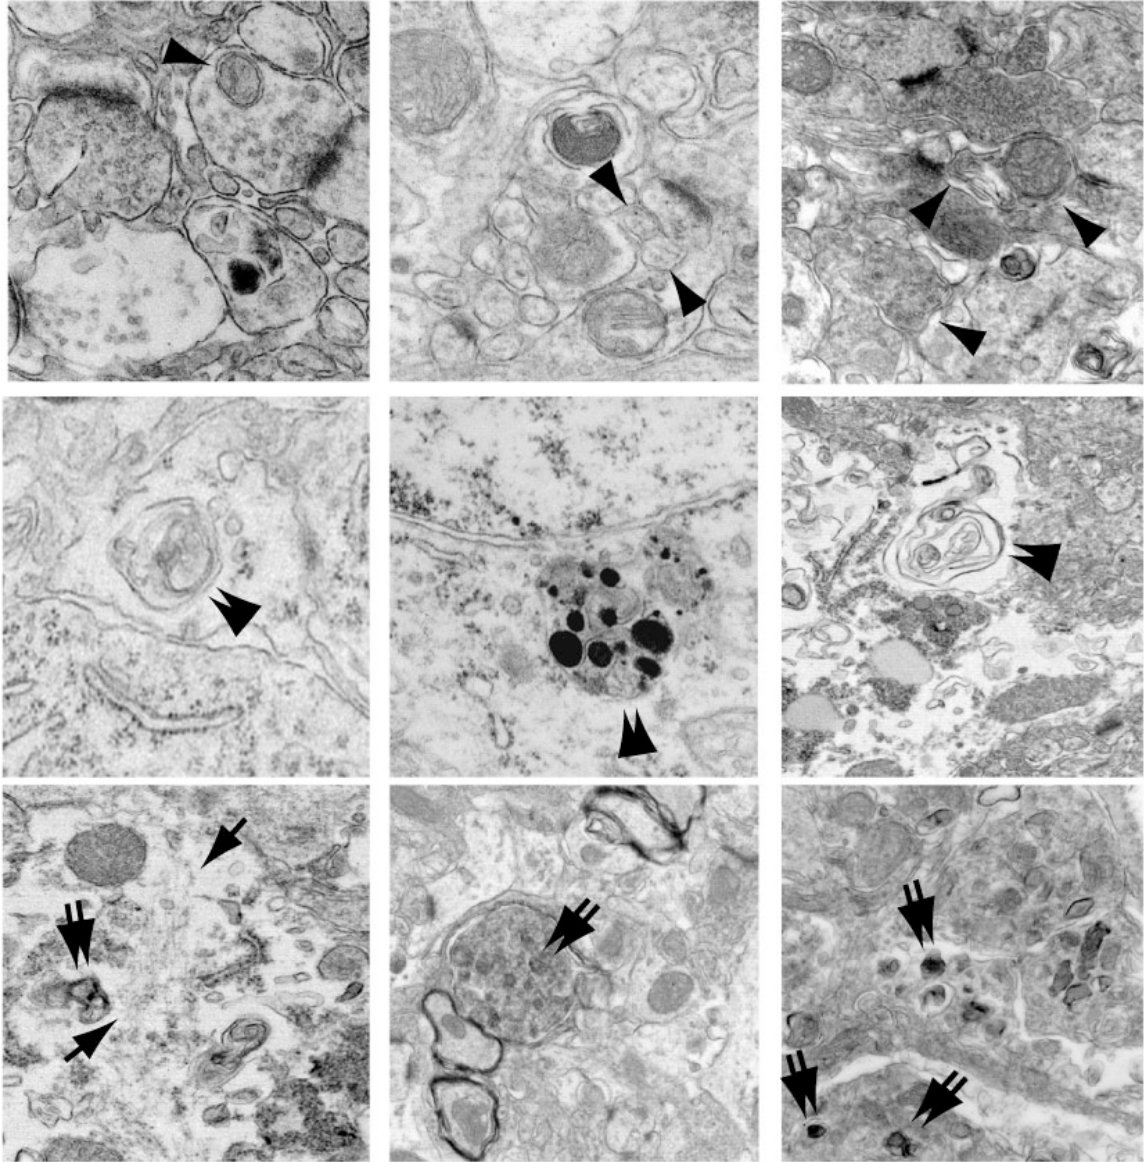

Supplement: JCI0833585sd.pdf [file JCI0833585sd.pdf]
